# Supplementary material
Source: publisher figshare collection journal article supplement (https://acs.figshare.com/ndownloader/files/4660381)
Supplement: Supplementary file 1 [file 4660381]

**Supporting Information for**

**Intermolecular Interaction-Induced Hierarchical  
Transformation in 1D Nanohybrids: Analysis of  
Conformational Changes by 2 Dimensional  
Correlation Spectroscopy**

*HoSeok Park,<sup>†</sup> Yeong Suk Choi,<sup>‡</sup> Young Mee Jung,<sup>§</sup> Won Hi Hong<sup>†\*</sup>*

<sup>†</sup>Department of Chemical and Biomolecular Engineering (BK21 Program), KAIST,

Guseong-dong 373-1, Yusong-gu, Daejeon, Republic of Korea

<sup>‡</sup> Energy & Environment Laboratory, Samsung Advanced Institute of Technology

(SAIT), P.O. Box 111, Suwon, Republic of Korea

<sup>§</sup>Department of Chemistry, Kangwon National University, Chunchon, Republic of

Korea

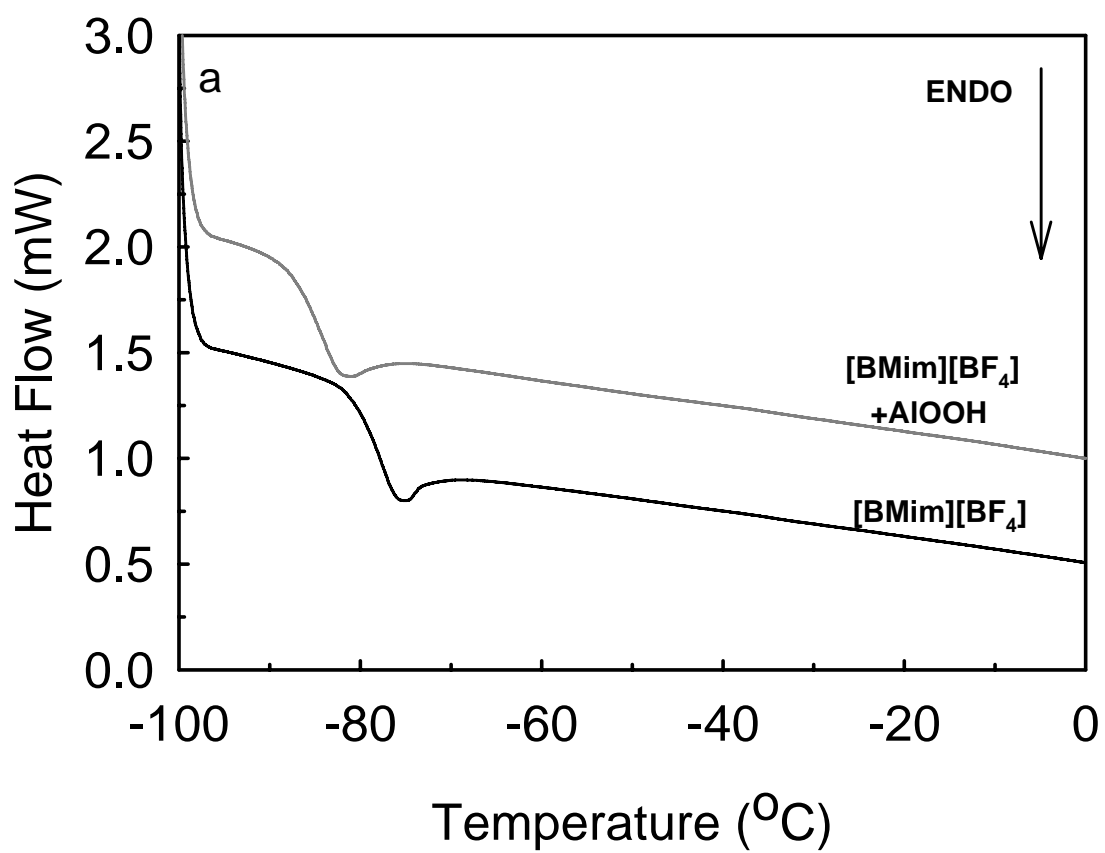

**Figure S1.** DSC curves of (a) [BMim][BF<sub>4</sub>]+AlOOH conventional mixture and [BMim][BF<sub>4</sub>] and (b) RAH 1 and RAH 2.

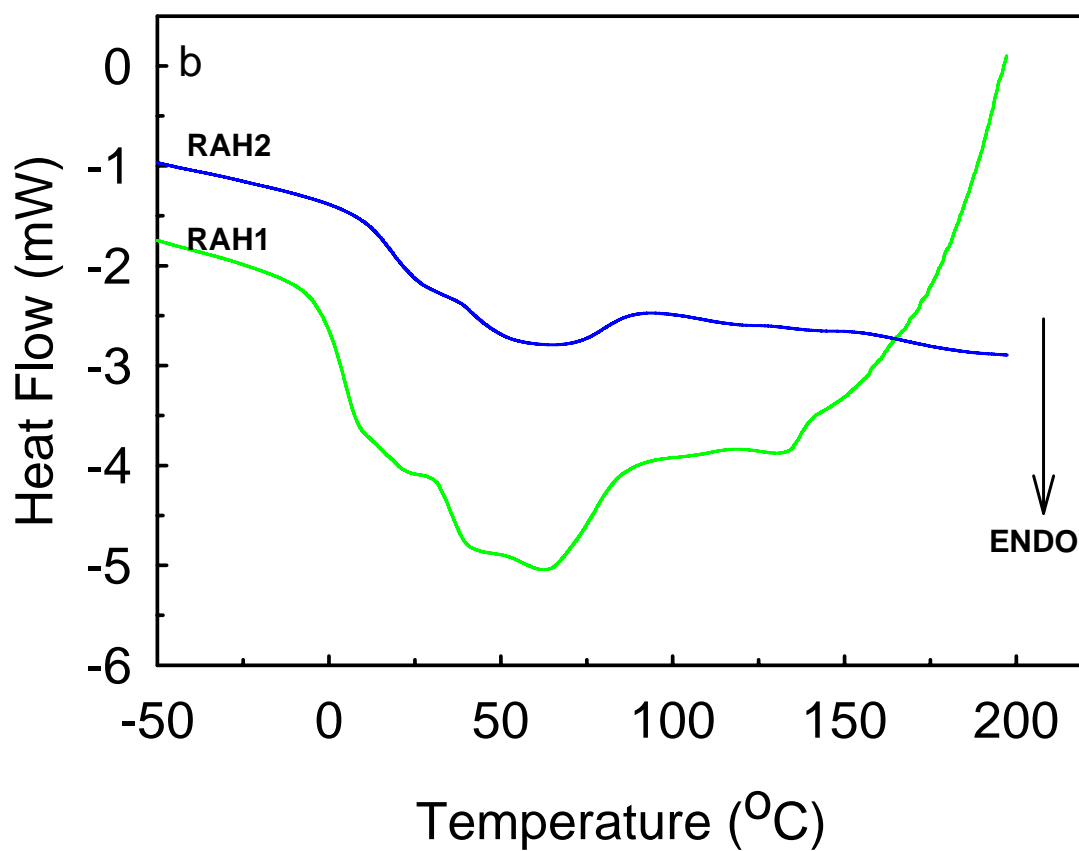

**Figure S1.** DSC curves of (a) [BMim][BF<sub>4</sub>]+AlOOH conventional mixture and [BMim][BF<sub>4</sub>] and (b) RAH 1 and RAH 2.

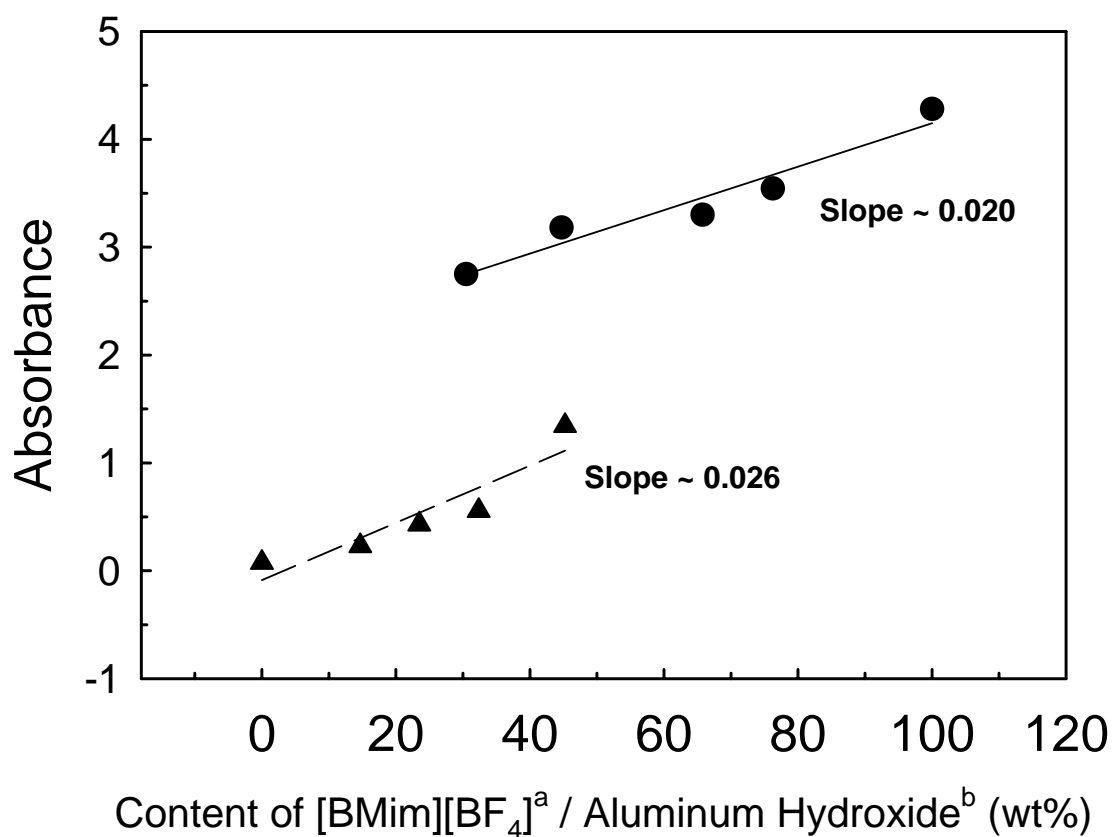

**Figure S2.** Changes in the absorbance at 230 nm / 300 nm as functions of the contents of [BMim][BF<sub>4</sub>] (circle) / aluminum hydroxide (triangle) in hybrids.

<sup>a</sup> wt % of [BMim][BF<sub>4</sub>] was calculated by elemental analysis.

<sup>b</sup> wt % of aluminum hydroxide was determined by subtracting wt % of [BMim][BF<sub>4</sub>] and chemisorbed water from hybrids given by Table 1.

As shown in Figure S2, we plotted the changes in the absorbance as functions of the contents of [BMim][BF<sub>4</sub>] / aluminum hydroxide. In RAH system, the absorbance of [BMim][BF<sub>4</sub>] was increased with its content at 230 nm, whereas the absorbance of aluminum hydroxide was increased with its content at 300 nm. The slopes of two curves obtained from approximate linear relation are ca. 0.020 for [BMim][BF<sub>4</sub>] and 0.026 for aluminum hydroxide. Considering reciprocal relation of relative content of [BMim][BF<sub>4</sub>] and aluminum hydroxide in RAHs, similar slopes of two curves can support reciprocal transition of UV spectra.
